# Supplementary material
Source: PubMed Central journal article supplement (PMC3774211)

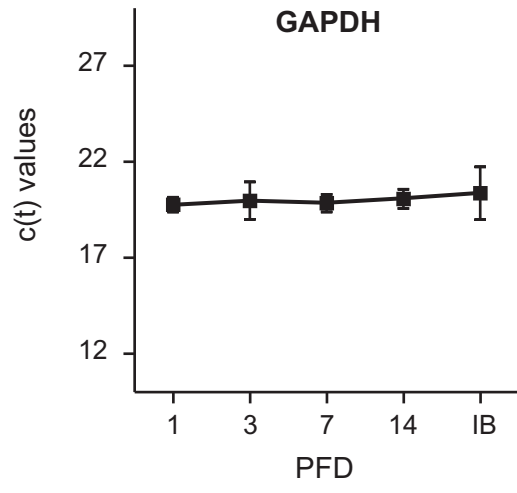

Supplement: supp_japplphysiol.00839.2010_gene_expression.pdf [file supp_japplphysiol.00839.2010_gene_expression.pdf]
